# Supplementary material
Source: PubMed Central journal article supplement (PMC7689306)
Supplement: mmc1.pdf [file mmc1.pdf]

## Supplemental Information

### Longitudinal Multi-omics Analyses Identify Responses of Megakaryocytes, Erythroid Cells, and Plasmablasts as Hallmarks of Severe COVID-19

Joana P. Bernardes, Neha Mishra, Florian Tran, Thomas Bahmer, Lena Best, Johanna I. Blase, Dora Bordoni, Jeanette Franzenburg, Ulf Geisen, Jonathan Josephs-Spaulling, Philipp Köhler, Axel Künstner, Elisa Rosati, Anna C. Aschenbrenner, Petra Bacher, Nathan Baran, Teide Boysen, Burkhard Brandt, Niklas Bruse, Jonathan Dörr, Andreas Dräger, Gunnar Elke, David Ellinghaus, Julia Fischer, Michael Forster, Andre Franke, Sören Franzenburg, Norbert Frey, Anette Friedrichs, Janina Fuß, Andreas Glück, Jacob Hamm, Finn Hinrichsen, Marc P. Hoepfner, Simon Imm, Ralf Junker, Sina Kaiser, Ying H. Kan, Rainer Knoll, Christoph Lange, Georg Laue, Clemens Lier, Matthias Lindner, Georgios Marinos, Robert Markewitz, Jacob Nattermann, Rainer Noth, Peter Pickkers, Klaus F. Rabe, Alina Renz, Christoph Röcken, Jan Rupp, Annika Schaffarzyk, Alexander Scheffold, Jonas Schulte-Schrepping, Domagoj Schunk, Dirk Skowasch, Thomas Ulas, Klaus-Peter Wandinger, Michael Wittig, Johannes Zimmermann, Hauke Busch, Bimba F. Hoyer, Christoph Kaleta, Jan Heyckendorf, Matthijs Kox, Jan Rybniker, Stefan Schreiber, Joachim L. Schultze, Philip Rosenstiel, HCA Lung Biological Network, and the Deutsche COVID-19 Omics Initiative (DeCOI)

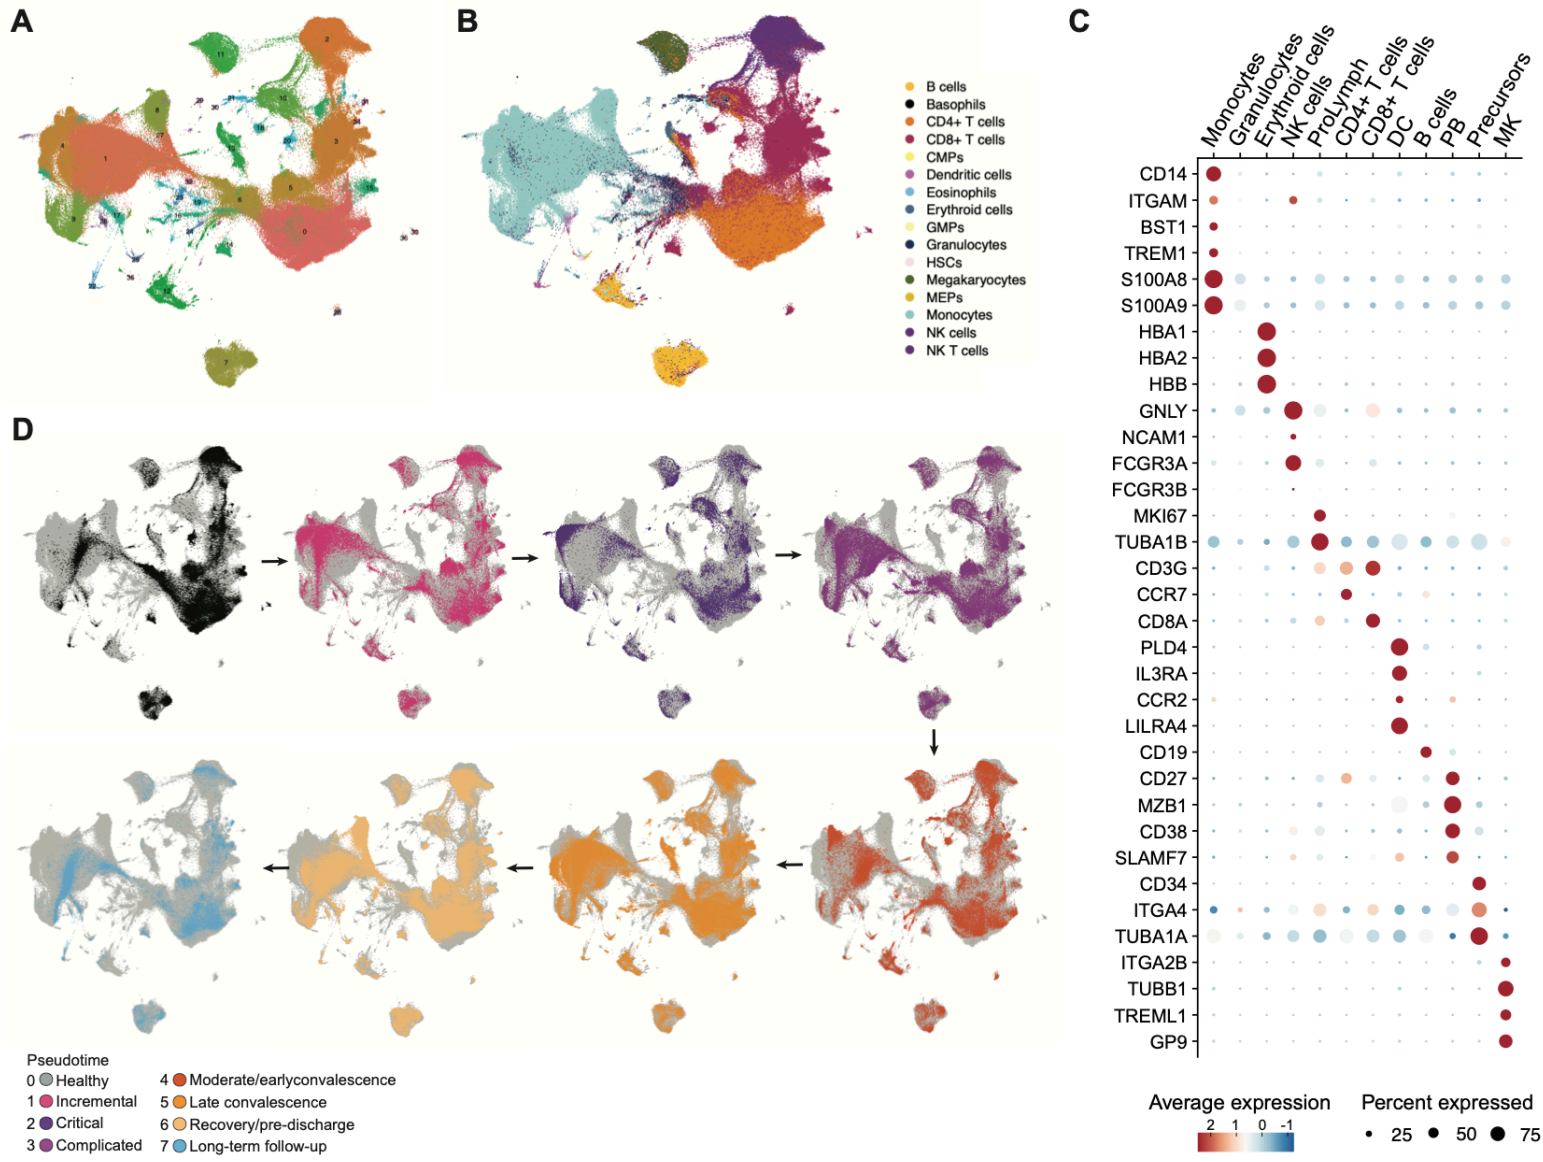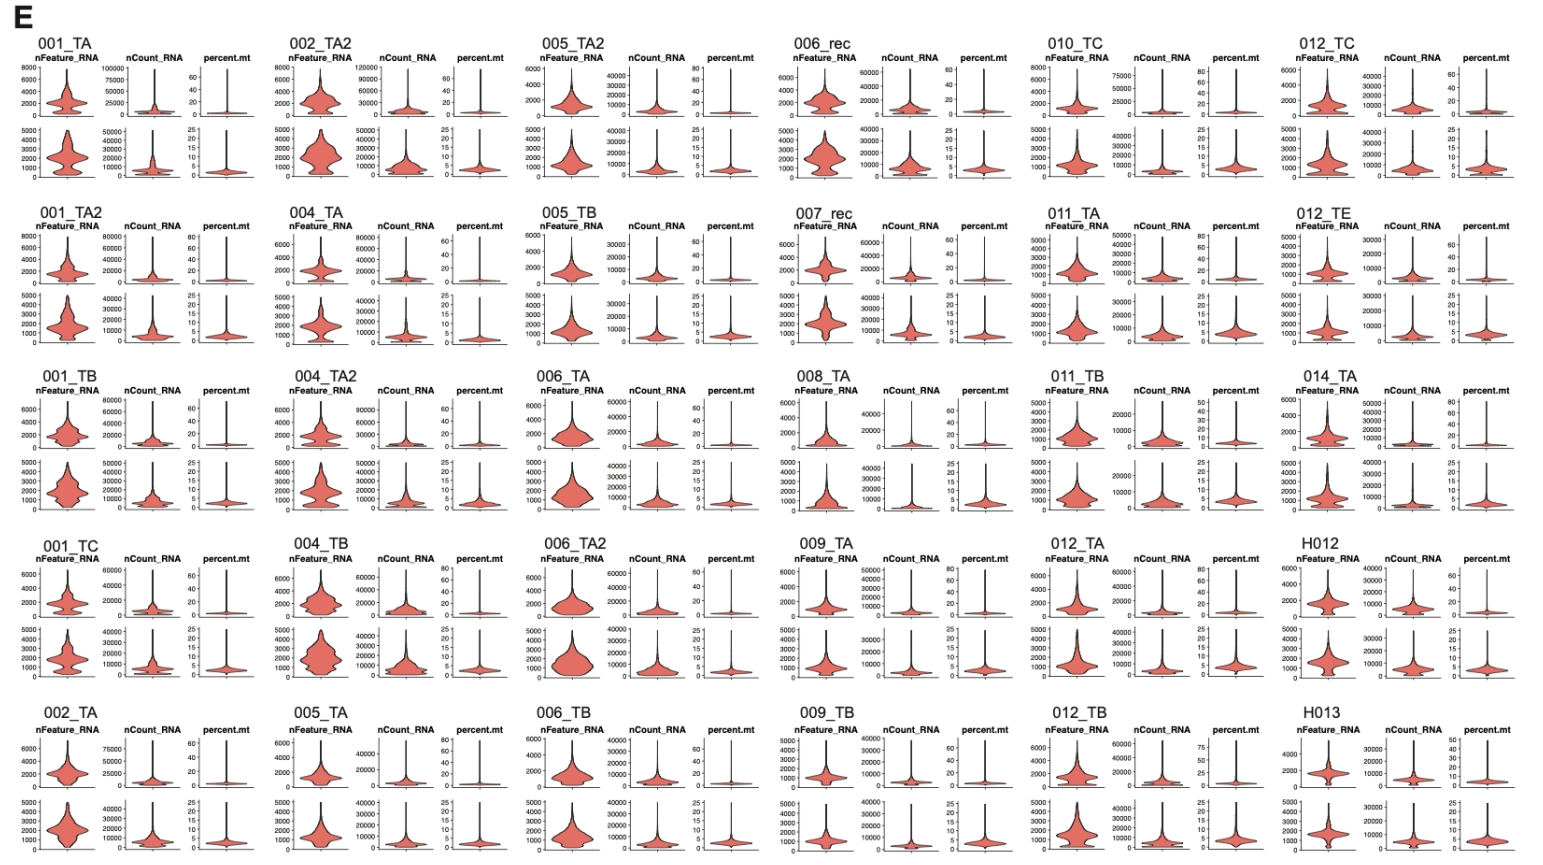

**A**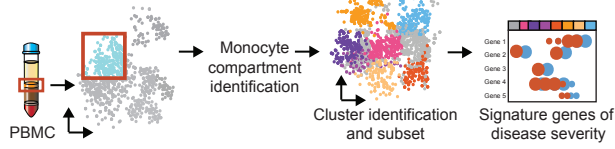

Pseudotime

0 ● Healthy

1 ● Incremental

2 ● Critical

3 ● Complicated

4 ● Moderate/early convalescence

5 ● Late convalescence

6 ● Recovery/pre-discharge

7 ● Long-term follow-up

**B**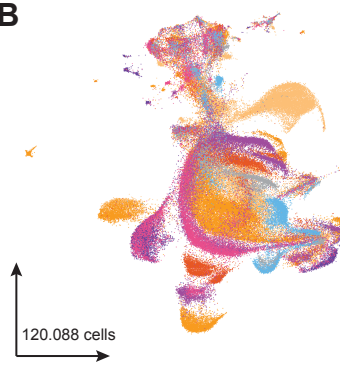**C**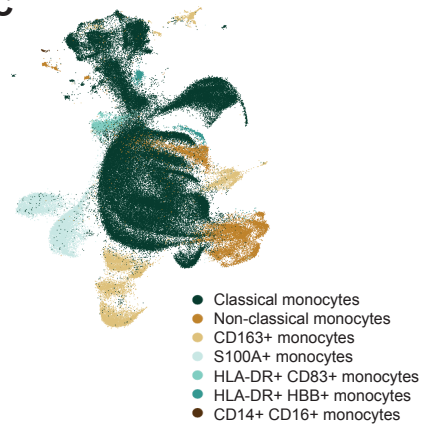**D**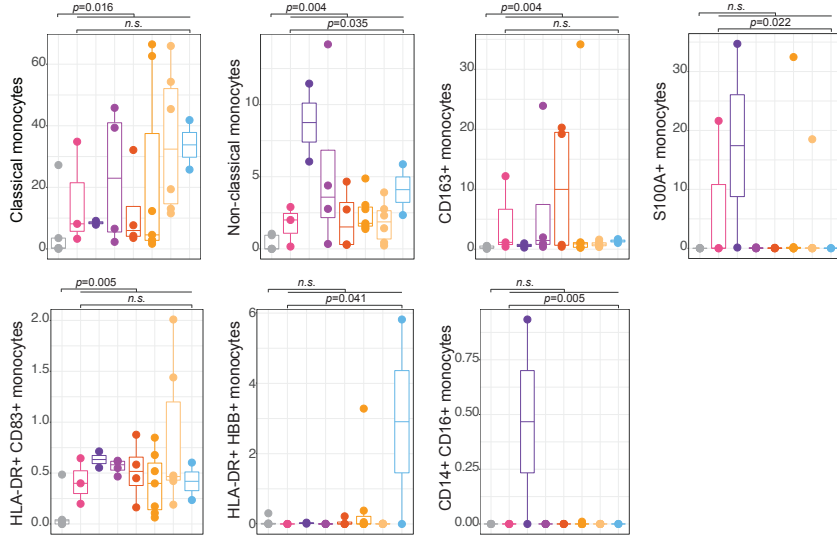**E**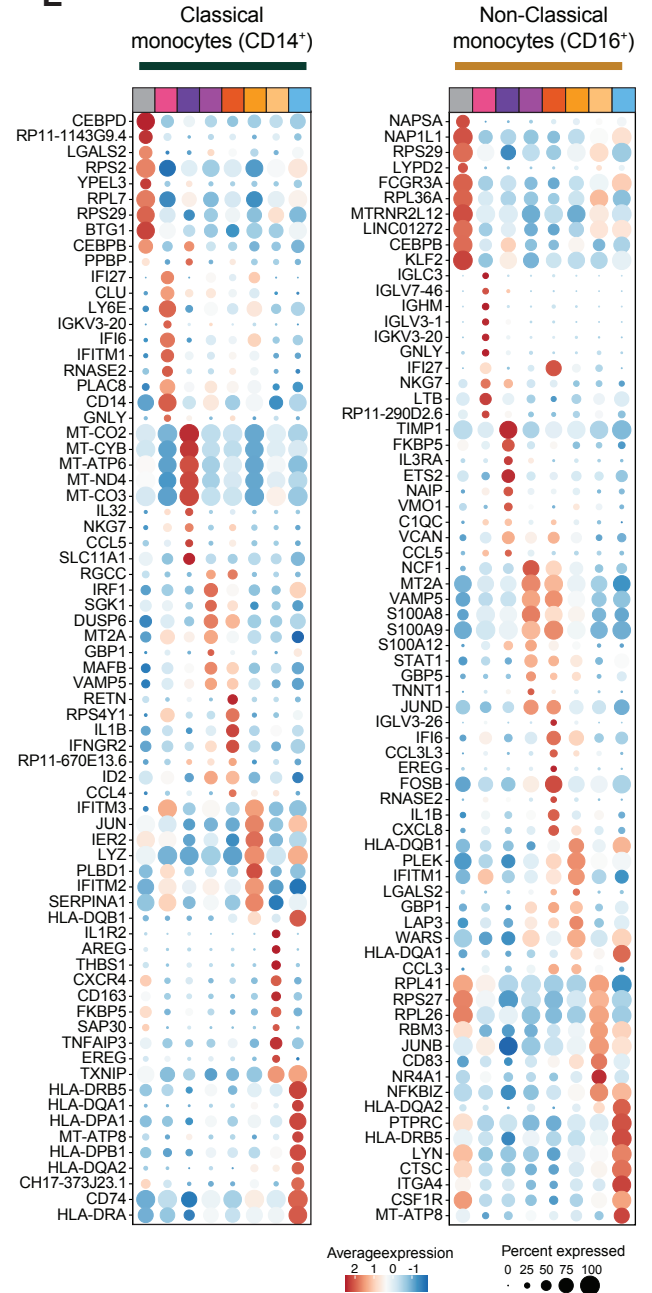**F**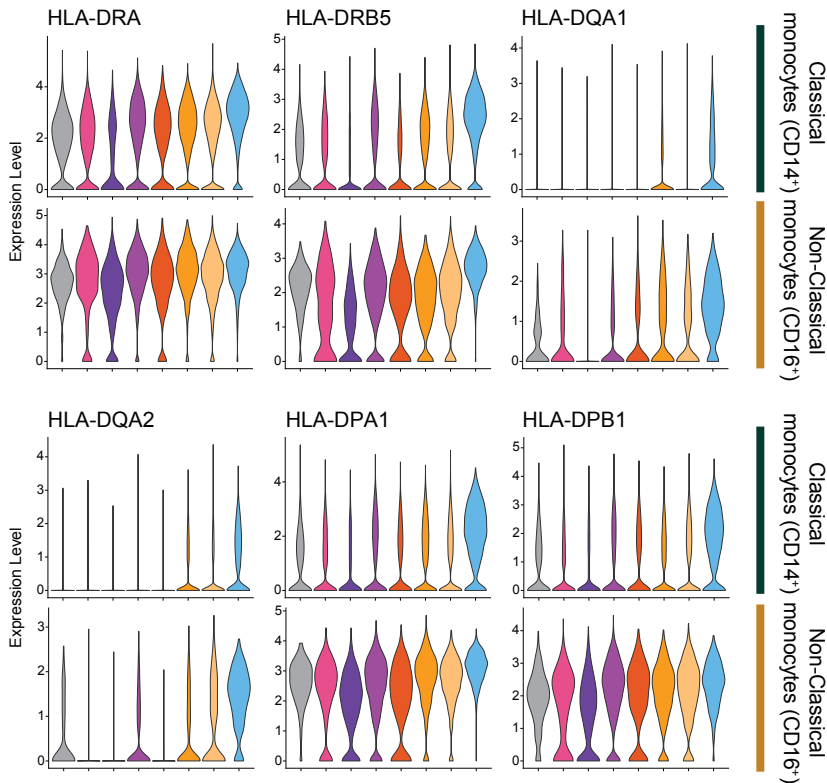





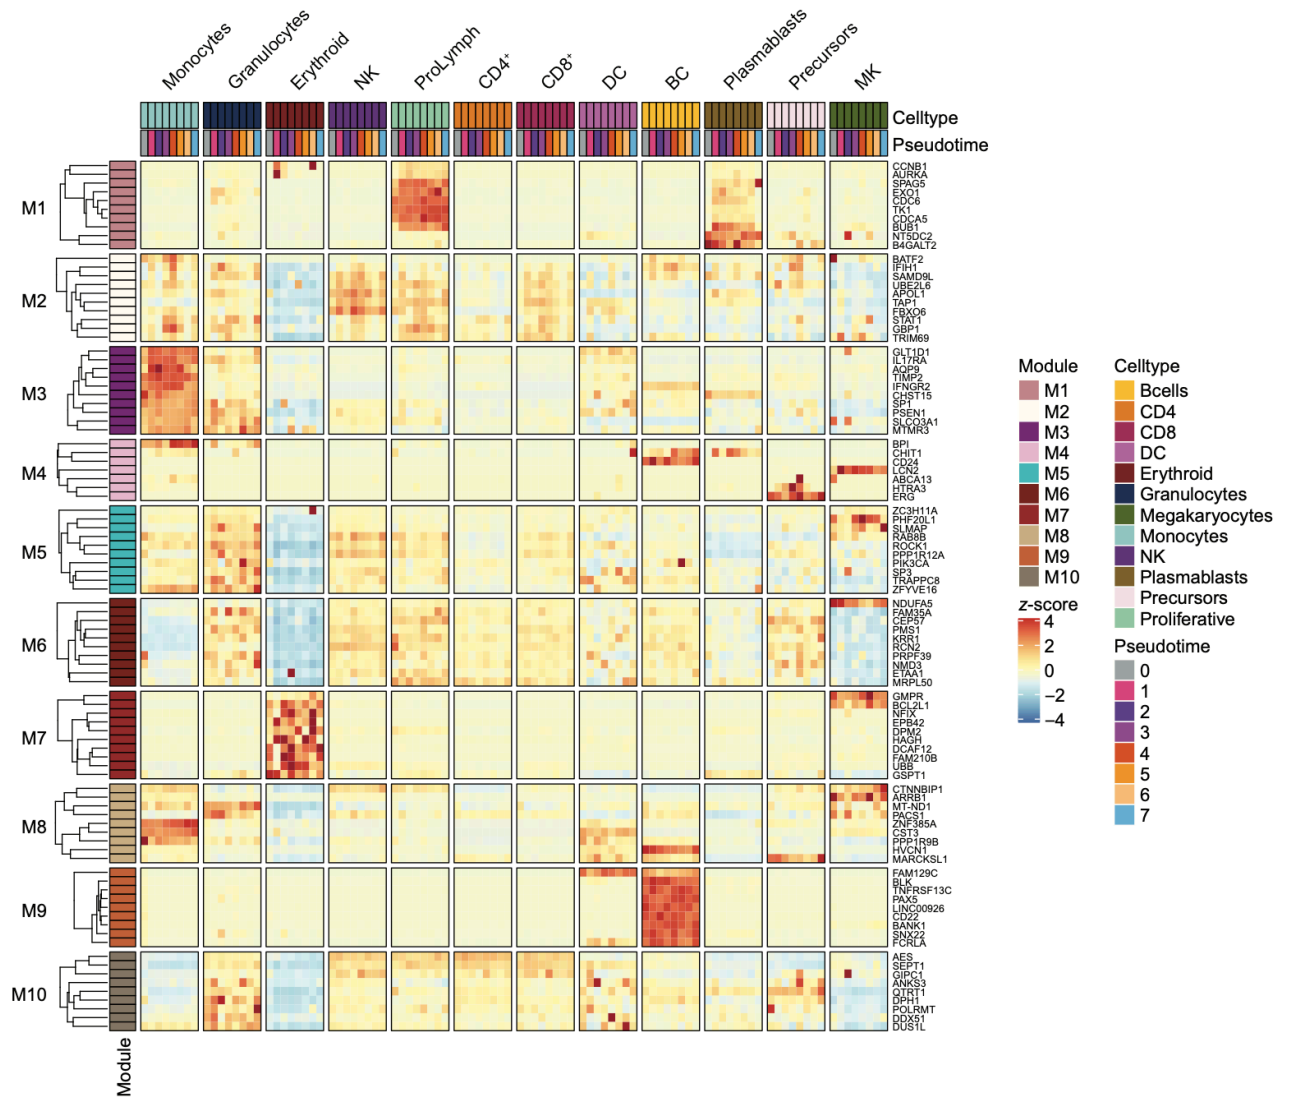

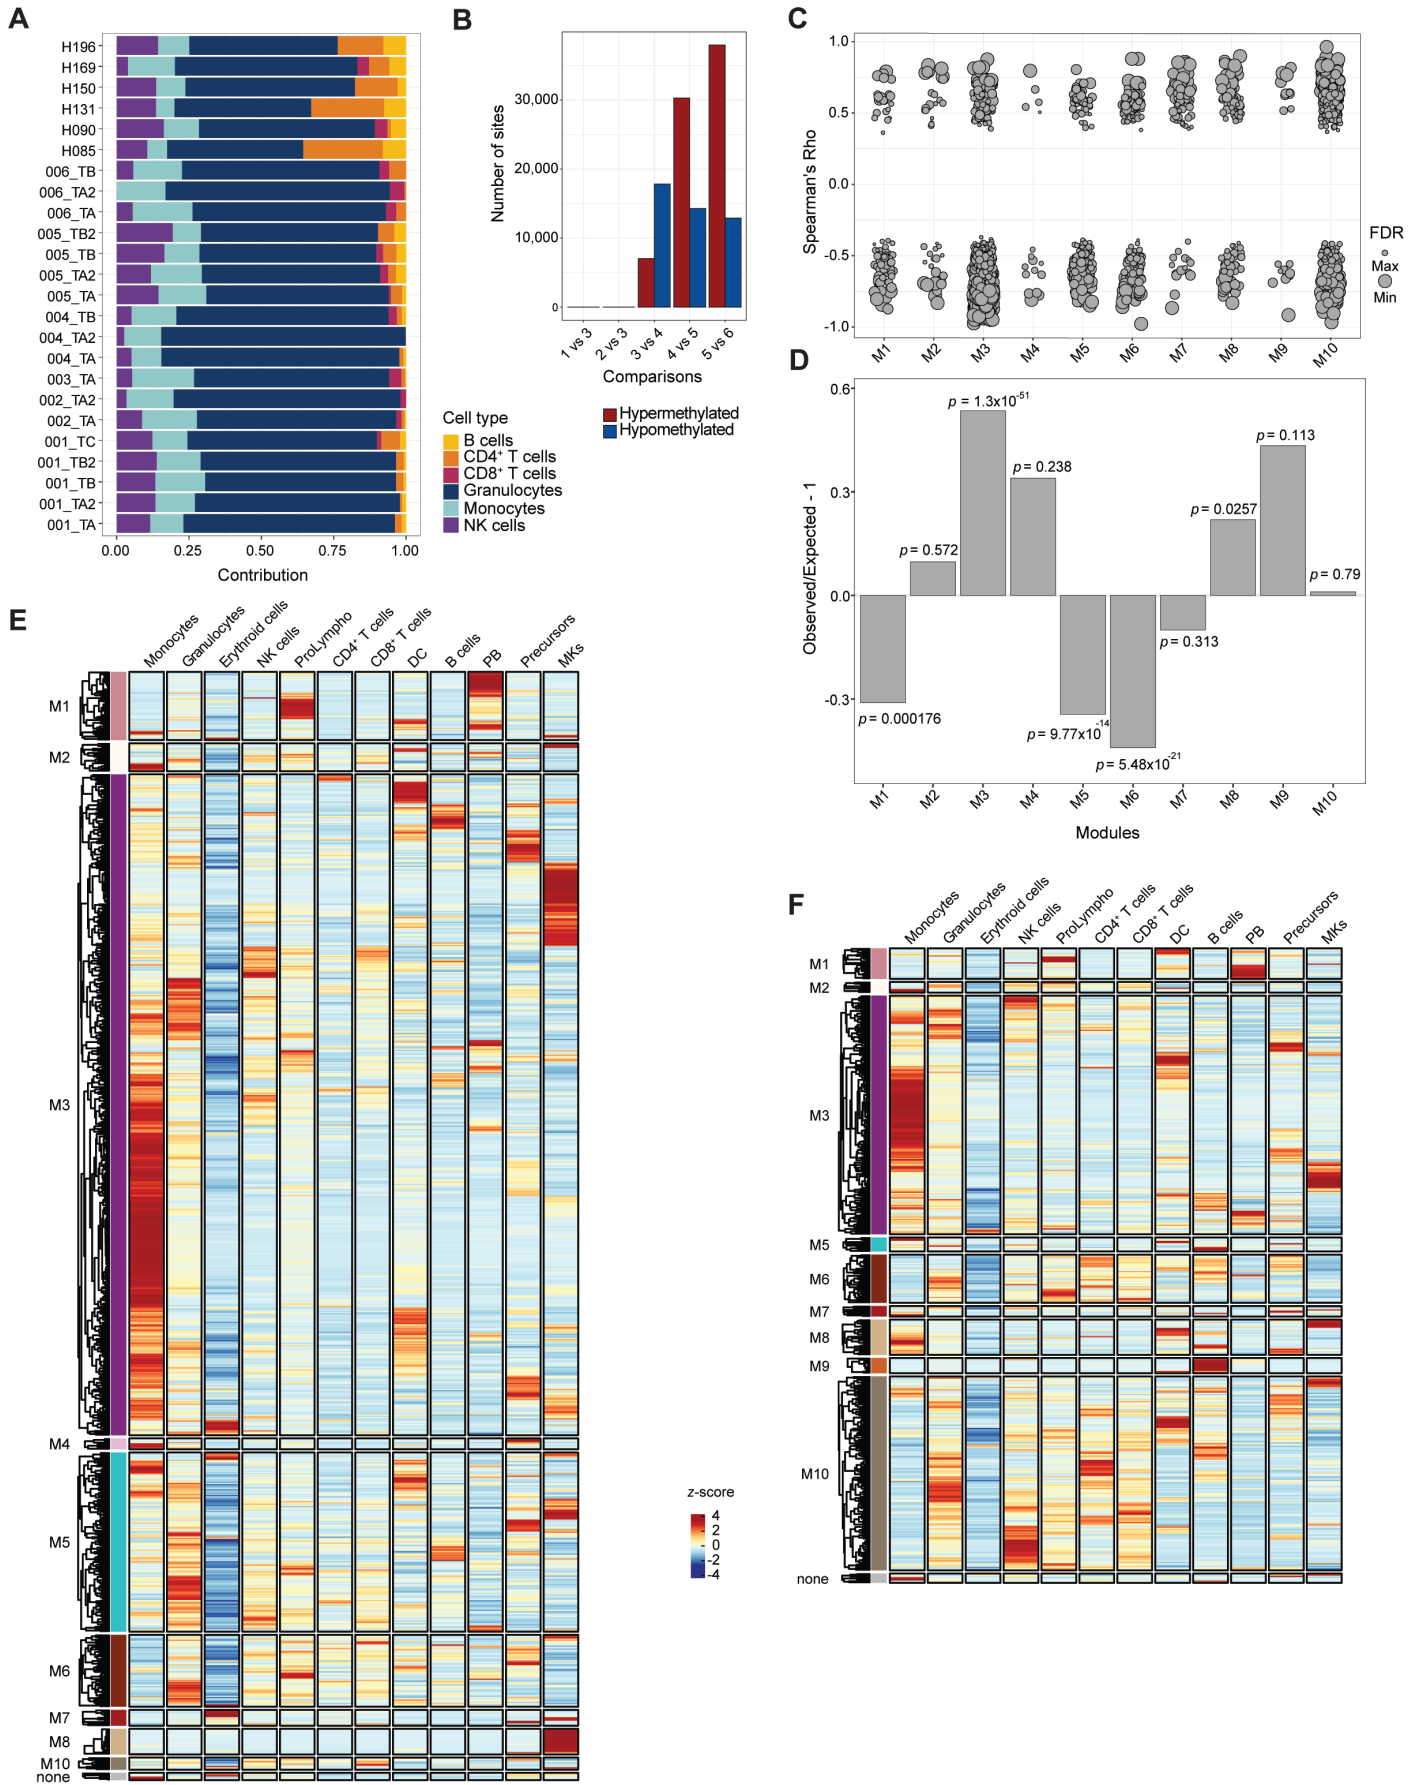

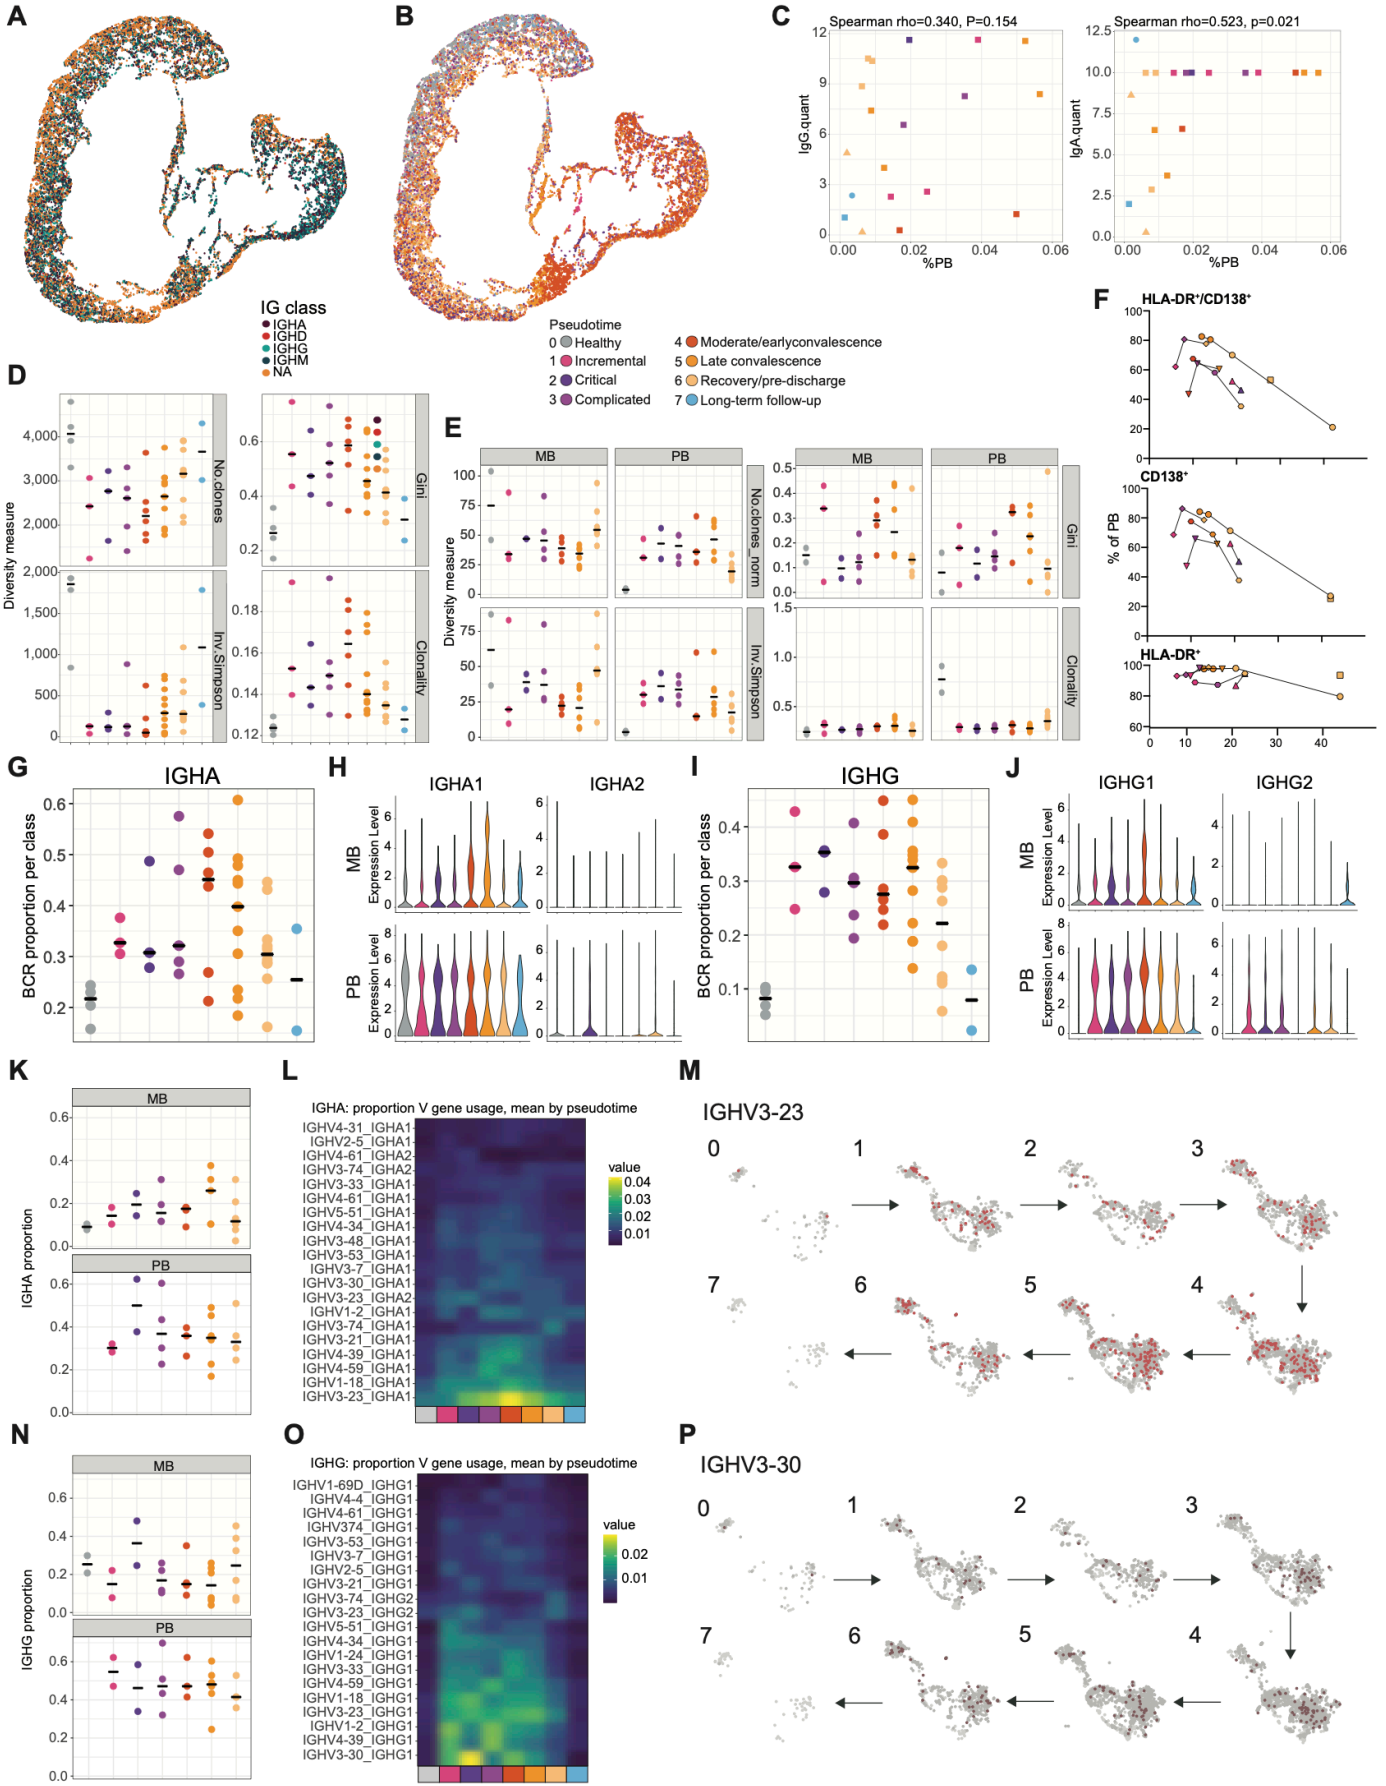

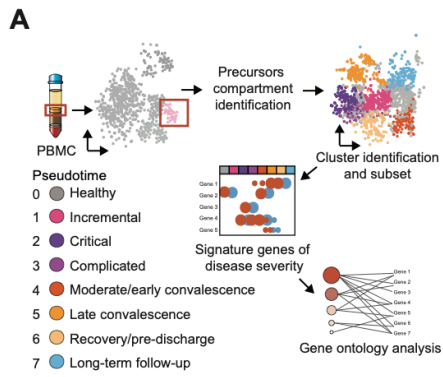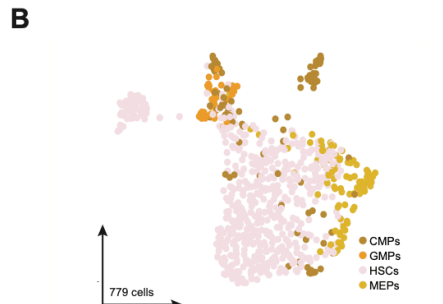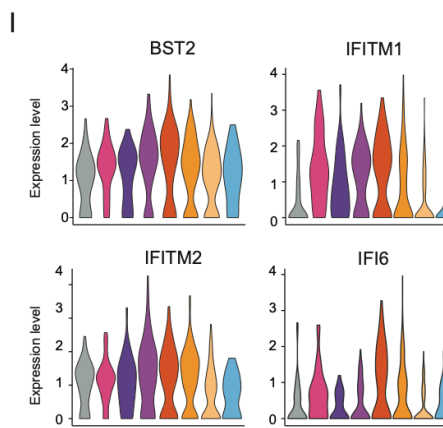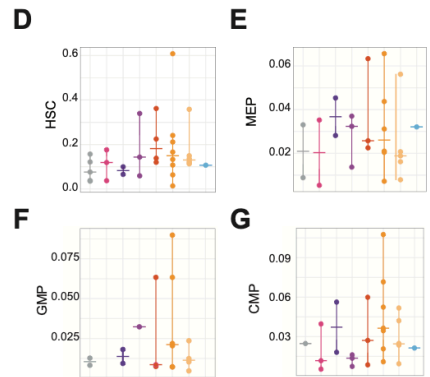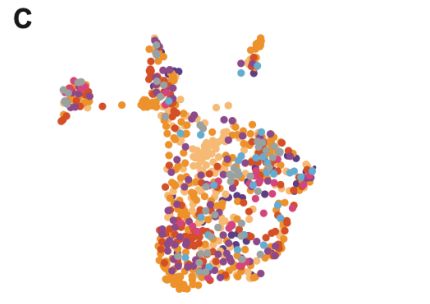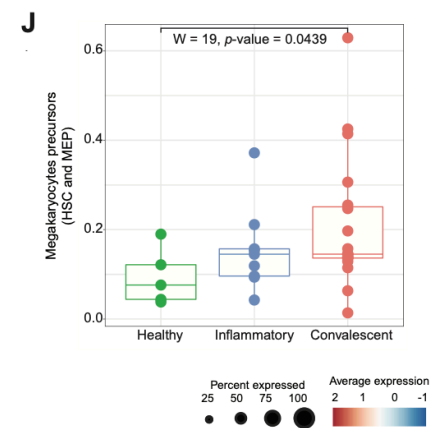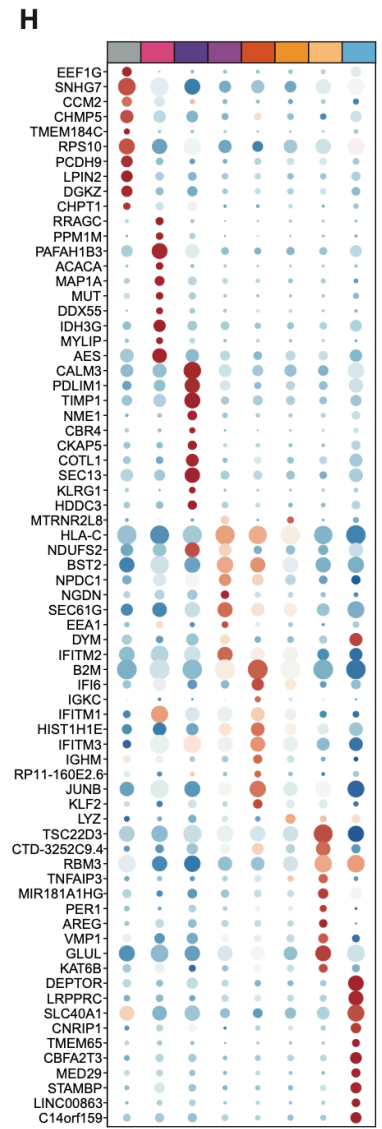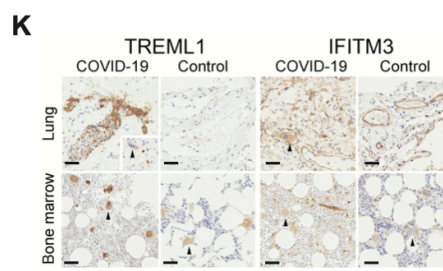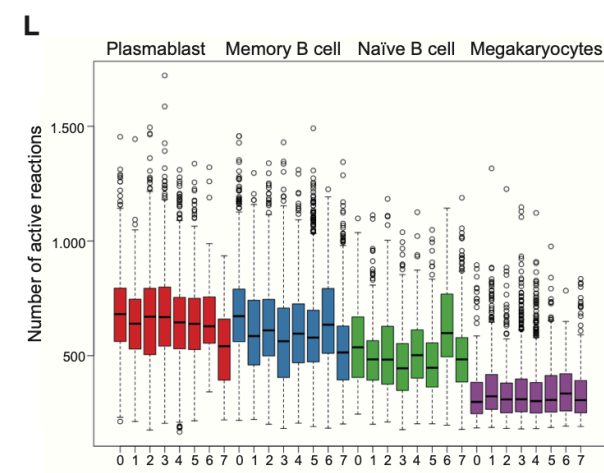



**Table S2. Pseudotime definition. (related to Figure 1)**

| <b>Pseudotime</b> | <b>Disease Phase</b>         | <b>Clinical Score</b> |
|-------------------|------------------------------|-----------------------|
| 0                 | Uninfected (Control)         | 1                     |
| 1                 | Incremental                  | Increasing            |
| 2                 | Critical                     | 9* - 13               |
| 3                 | Complicated                  | 7 - 9*                |
| 4                 | Complicated                  | 6                     |
| 5                 | Moderate/early convalescence | 4 - 5                 |
| 6                 | Late convalescence           | 3                     |
| 7                 | Long-term follow-up          | 1 - 2                 |

The Clinical Score is composed by the sum of the WHO Ordinal Scale and three lab value-based subscores: CRP (0 p: < 30 mg/l, 1 p: ≥ 30 mg/l, 2 p: ≥ 100 mg/l, 3 p: ≥ 200 mg/l), IL-6 (0 p: < 200 ng/l, 1 p: ≥ 200 ng/l), ferritin (0 p: < 1000 mg/l, 1 p: ≥ 1000 mg/l, 2 p: ≥ 4000 mg/l).

\* If Ordinal Scale is 6 p or higher, the disease phase was classified as "critical".

**Table S4. Cohort 3 basic characteristics. (related to Figure 8)**

| <b>Patient ID</b> | <b>Age</b> | <b>Sex</b> | <b>Death</b> |
|-------------------|------------|------------|--------------|
| COR005            | 67         | F          | no           |
| COR010            | 73         | M          | <b>yes</b>   |
| COR011            | 81         | M          | <b>yes</b>   |
| COR012            | 73         | M          | <b>yes</b>   |
| COR013            | 68         | M          | no           |
| COR014            | 47         | M          | no           |
| COR015            | 72         | M          | no           |
| COR016            | 71         | M          | no           |
| COR017            | 65         | M          | no           |
| COR018            | 60         | F          | no           |
| COR019            | 74         | M          | no           |
| COR021            | 73         | M          | no           |
| COR022            | 69         | M          | no           |
| COR025            | 67         | F          | <b>yes</b>   |
| COR026            | 70         | F          | no           |
| COR027            | 68         | M          | no           |
| COR028            | 60         | F          | no           |
| COR031            | 74         | M          | no           |
| COR032            | 53         | M          | no           |
| COR033            | 61         | M          | no           |
| COR035            | 57         | M          | no           |
| COR037            | 54         | F          | no           |
| COR039            | 64         | M          | no           |
| COR041            | 62         | M          | no           |
| COR042            | 64         | M          | no           |
| COR043            | 76         | M          | no           |
| COR045            | 60         | M          | <b>yes</b>   |
| COR046            | 47         | F          | no           |
| COR048            | 67         | F          | no           |
| COR050            | 73         | M          | no           |
| COR053            | 72         | M          | no           |
| COR054            | 59         | M          | no           |
| COR055            | 76         | M          | <b>yes</b>   |
| COR056            | 65         | F          | no           |
| COR057            | 69         | M          | <b>yes</b>   |
| COR059            | 55         | M          | no           |
| COR060            | 59         | M          | no           |
| COR062            | 69         | F          | no           |
| COR066            | 54         | M          | no           |
| COR067            | 21         | M          | no           |

Abbreviations: F = female, M = male

### **Figure S1. Details of scRNA-seq (related to Figure 2)**

**A**, Cluster UMAP representation of all merged samples. In total, 358.930 cells are depicted. Cells are coloured by Single R qualification.

**B**, SingleR UMAP representation of all merged samples. In total, 358.930 cells are depicted. Cells are coloured by cluster.

**C**, Dot plot for expression of cell type marker genes. Colour discriminates genes with increased (red) or decreased (blue) expression, while point sizes represents the number of cells per group expressing the corresponding gene.

**D**, Cells attributed to disease trajectory of COVID-19. For each UMAP, pseudotime-specific cells were highlighted by colour.

**E**, Quality control violin plots of individual samples. Up panel referring to cells before quality filtering based on percentage of mitochondria and bottom panels referring to filtered cells that were further use in the analysis.

### **Figure S2. Monocyte lineage patterns in COVID-19 (related to Figure 2)**

**A**, Schematic workflow of the scRNA-seq analyses performed on monocytes identified in Figure 2.

**B**, Monocytes pseudotimes represented as a UMAP. In total 120.088 cells are depicted.

**C**, Monocytes represented as a UMAP. In total 120.088 cells are depicted. Clusters represented are classical monocytes (dark green), nonclassical monocytes (brown), CD163<sup>+</sup> monocytes (cream), S100A<sup>+</sup> monocytes (light blue), HLA-DR<sup>+</sup> CD83<sup>+</sup> monocytes (blue), HLA-DR<sup>+</sup> HBB<sup>+</sup> monocytes (dark blue) and CD14<sup>+</sup>CD16<sup>+</sup> monocytes (dark brown).

**D**, Monocytes subtypes proportions grouped by disease phases. Points represent individual samples and horizontal bars the mean of a particular pseudotime. Pseudotimes are represented by colours.

**E**, Dot plot for signature genes in monocyte subtypes. Left panel depicting top signature genes per pseudotime of classical monocytes and right panel depicting top signature genes per pseudotime of nonclassical monocytes. Genes were selected based on increased expression of the ten most characteristic genes. Colour discriminates genes with increased (red) or decreased (blue) expression, while point sizes represents the number of cells per group expressing the corresponding gene.

**F**, Gene expression of genes of interest along the disease axis. Violin plot based on pseudotime expressions classified by colour for *HLA* genes.

### **Figure S3. Analysis of bulk RNA-seq data (related to Figure 3 and Figure 4)**

**A**, Number of significantly differentially expressed genes (DEGs) between controls and COVID-19 pseudotimes and number of longitudinal DEGs across different pseudotimes. Colours discriminate genes with increased (red) or decreased (blue) expression in COVID-19 samples compared to controls and longitudinal DEGs (purple).

**B**, Heatmap showing genes differentially expressed between critical (pseudotime 2) and complicated (pseudotime 3) disease. The normalized gene counts are scaled by row and row-wise z-scores are plotted in the heatmap.

**C**, Heatmap depicting the activity of top 50% most variable transcriptions factors (TFs) across the seven pseudotimes relative to the controls. A star within a cell denotes a significant ( $p$ -value < 0.05) activation or inhibition of the respective TF.

**D**, Heatmap depicting the degree centrality of all inferred networks across the pseudotimes. Rows have been clustered by complete linkage according to their Euclidian distance.

**E**, Disease-state specific total metabolic activity for bulk RNA-seq data showing the total number of active reactions for context-specific metabolic models.

**F**, Eigengene heatmap of co-expression modules constructed using all pairwise and longitudinal differentially expressed genes. Columns are ordered by pseudotimes and annotated by age, gender and patient IDs.

**G**, Heatmap showing the significant enrichment, quantified by odds ratio, of transcription factor binding sites (TFBS) in the gene co-expression modules. Selected top TFs are visualized.

#### **Figure S4. Projection of modules in scRNA-seq data (related to Figure 4)**

Heatmap showing the average expression of module hub genes in different cell types and pseudotimes of cohort 1 (from scRNA-seq data). Row-wise z-scores of the average gene counts are plotted in the heatmap. Genes are labelled by the co-expression modules and are hierarchically clustered for each module separately.

#### **Figure S5. Genome-wide DNA methylation patterns in COVID-19 (related to Figure 4)**

**A**, RnBeads computational deconvolution of whole blood samples from COVID-19 patients and controls based on EPIC array data.

**B**, Number of significantly differentially methylated positions (DMPs) between subsequent COVID-19 pseudotimes. Colours discriminate hypermethylated (red) and hypomethylated (blue) sites in later COVID-19 pseudotimes compared to former.

**C**, Correlation between co-expression module genes and their nearby DMPs. Each point represents a gene, and the size of the points is proportional to statistical significance (FDR) of the correlation with larger points being more significant. DMP-DEG correlations with FDR < 0.05 are



visualized. The positions of individual points are jittered horizontally in order to show the density of the data.

**D**, Over-representation and under-representation of significantly correlated DMP-DEG in each of the co-expression modules. The over-/under-representation is quantified as the ratio of observed and expected number of correlated genes present in each module under the Chi-square distribution.

**E**, Heatmap showing the average expression of canonical DMP-DEGs with increased expression in active disease (pseudotimes 1, 2, 3 and 4) in different cell-types of cohort 1 (from scRNA-seq data). The average expression in severe stages of the disease (pseudotimes 1, 2 and 3) is shown. The average genes counts are scaled by row and row-wise z-scores are plotted in the heatmap. Genes are labelled by the co-expression modules and are hierarchically clustered for each module separately.

**F**, Heatmap showing the average expression of canonical DMP-DEGs with decreased expression in disease recovery (pseudotimes 5 and 6) in different cell-types of cohort 1 (from scRNA-seq data). The average expression in recovery stages of the disease (pseudotimes 5 and 6) is shown. The average genes counts are scaled by row and row-wise z-scores are plotted in the heatmap. Genes are labelled by the co-expression modules and are hierarchically clustered for each module separately.

### **Figure S6. B cell lineage patterns and BCR changes in COVID-19 (related to Figure 5)**

**A**, Cell trajectory analysis of B cell compartment. Cell trajectory was calculated using Monocle3 and the cells coloured by IG class. Pseudotimes are represented by colours. Spearman correlation values on top of each graph.

**B**, Cell trajectory analysis of B cell compartment. Cell trajectory was calculated using Monocle3 and the cells coloured by pseudotime.

**C**, Correlation of antibodies of interest with proportion of plasmablast. Left panel corresponds to IgG levels and right panel to IgA levels. Plasmablast levels as percentage to total cell numbers and Ig levels as OD measurements.

**D**, BCR diversity measures classified by pseudotime. Data based on bulk BCR-seq analysis. BCR diversity as number of clones (top left), inverse Simpson index (bottom left), Gini inequality index (top right) and clonality (bottom right).

**E**, BCR diversity measures for B cell subtypes classified by pseudotime. Data based on scBCR-seq. Diversity measures grouped by B cell subtypes memory B cells and plasmablasts. BCR diversity as number of clones (top left), inverse Simpson index (bottom left), Gini-Simpson index (top right) and clonality (bottom right).

**F**, Flow cytometry analysis of Plasmablasts. Plasmablasts were stained for HLA-DR and CD138. Double positive HLA-DR<sup>+</sup>/CD138<sup>+</sup> cells on top panel, CD138<sup>+</sup> cells on center panel and HLA-DR<sup>+</sup> cells on bottom panel. Proportions of plasmablasts were plotted against the sampling time relative to the disease onset. The points were coloured by corresponding pseudotime and connected by patient. Only patients from Kiel cohort ( $n = 7$  individuals) are depicted.

**G**, IGHA BCR proportion classified by pseudotime. Data based on bulk BCR-seq analysis.

**H**, Gene expression of genes related to IGHA by pseudotimes. *IGHA1* and *IGHA2* expression classified by pseudotimes (colour) for Memory B cells (top) or plasmablast (bottom).

**I**, IGHG BCR proportion classified by pseudotime. Data based on bulk BCR-seq analysis.

**J**, Gene expression of genes related to IGHG by pseudotimes. *IGHG1* and *IGHG2* expression classified by pseudotimes (colour) for Memory B cells (top) or plasmablast (bottom).

**K**, IGHA BCR proportion for B cell subtypes. Memory B cells on top and plasmablast on bottom classified by pseudotime. Data based on scBCR-seq analysis.

**L**, Heatmap for proportion of V usage of IGHA. Top genes related to IGHA1 or IGHA2 by pseudotime. Usage frequency depicted by colour intensity. Data based on bulk BCR-seq analysis.

**M**, IGHV3-23 expression in plasmablasts during disease trajectory. For each UMAP, IGHV3-23-expressing cells were highlighted (red).

**N**, IGHG BCR proportion for B cell subtypes. Memory B cells on top and plasmablast in bottom classified by pseudotime.

**O**, Heatmap for proportion of V usage of IGHG. Top genes related to IGHG1 or IGHG2 by pseudotime. Usage frequency depicted by colour intensity. Data based on bulk BCR analysis.

**P**, IGHV3-30 expression in plasmablasts during disease trajectory. For each UMAP, IGHV3-30-expressing cells were highlighted (dark red).

### **Figure S7. Cell precursors patterns in COVID-19 (related to Figure 6)**

**A**, Schematic workflow of the scRNA-seq analyses performed on the cell precursors identified in Figure 2.

**B**, Cell precursors represented as a UMAP. In total 779 cells are depicted. Clusters represented are HSCs (pink), MEPs (yellow), CMPs (dark yellow) and GMPs (light orange).

**C**, Cell precursors pseudotimes represented as a UMAP. In total 779 cells are depicted.

**D**, HSCs-specific proportions grouped by disease phases. Points represent individual samples and horizontal bars the mean of a particular pseudotime. Pseudotimes are represented by colours.

**E**, MEPs-specific proportions by disease phases, pseudotimes are represented by colours.

**F**, GMPs-specific proportions grouped by disease phases. Points represent individual samples and horizontal bars the mean of a particular pseudotime. Pseudotimes are represented by colours.

**G**, CMPs-specific proportions grouped by disease phases. Points represent individual samples and horizontal bars the mean of a particular pseudotime. Pseudotimes are represented by colours.

**H**, Dot plot for signature genes in cell precursors. Genes were selected based on increased expression of the ten most characteristic genes. Colour discriminates genes with increased (red) or decreased (blue) expression, while point sizes represents the number of cells per group expressing the corresponding gene.

**I**, Gene expression of genes of interest along the disease axis. Violin plot based on pseudotime expressions classified by colour for *BST2*, *IFITM1*, *IFITM2* and *IFI6*.

**J**, HSCs and MEPs proportions grouped by disease state. Points depicting samples classified as healthy controls in green, as inflammatory stages (pseudotimes 1-3) in blue or as convalescent stages (pseudotimes 4-7) in red. Statistics based on Mann-Whitney U test.

**K**, Representative anti-TREML1- and anti-IFITM3-immunostaining of tissue specimens obtained from autopsy material from patient 002 and a gender- and age-matched patient (control). Note immunostaining of the megakaryocytes (arrow head) and particularly the presence of large numbers of TREML1-immunopositive platelets in the vessel lumina of the COVID-19 patient (left upper subpanel). Hematoxylin counterstain. Original magnifications: 400-fold.

**L**, Number of active reactions during disease course. Number of reactions calculated based on the metabolic model for plasmablasts (red), memory B cells (blue), naïve B cells (green) and megakaryocytes (purple). Number of active reactions corrected for cell number.
